# Supplementary material
Source: Research Square preprint supplement (doi:10.21203/rs.3.rs-6239391/v1)
Supplement: Supplementary file 1 [file 0694911a021b265faf34aff9.docx]

**SUPPLEMENTARY MATERIALS**

**Electrocardiographic signs to differentiate between chronic thromboembolic pulmonary hypertension and acute pulmonary embolism.** Waligóra et al.

**SUPPLEMENTARY TABLES**

**Supplementary Table 1.** Baseline characteristics of patients with acute pulmonary embolism initially diagnosed and in validation cohort.

|  | **APE – initial cohort (n = 71)** | **APE – validation cohort (n = 42)** | ***P* value** |
| --- | --- | --- | --- |
| Women | 40 (56.34%) | 18 (42.86%) | 0.17 |
| Age, y | 63 [43–71] | 64 [52–71] | 0.44 |
| NT-proBNP, pg/mL | 3081 [1789–7076] | 3994 [2283–6297] | 0.74 |
| Troponin, ng/mL | 0.073 [0.038–0.167] | 0.07 [0.039–0.132] | 0.61 |
| Creatinin, µmol/L | 85 [68–104] | 91.5 [76–99] | 0.38 |
| eGFR, ml/min/1.73 m2 | 77 [53–94] | 72 [55–88] | 0.6 |
| sPESI , median [IQR] | 1 [1–2] | 1.5 [1–2] | 0.99 |
| **RHCa** | | | |
| mPAP, mmHg | 31 [27–35] | 27 [24–30] | 0.67 |
| mRAP, mmHg | 10 [6–14] | 9 [6–11] | 0.58 |
| CI, l/min/m2 | 1.86 [1.57–2.22] | 2 [1.47–2.51] | 0.54 |

Data are presented as number (percentage) or median [IQR].

a Calculated for patients who underwent percutaneous treatment (56 patients in the initial cohort, 21 patients in the validation cohort) and thus had basic hemodynamic measurements taken during the procedure

Abbreviations: APE = acute pulmonary embolism, CI = cardiac index, CTEPH = chronic thromboembolic pulmonary hypertension, eGFR = estimated glomerular filtration rate, mPAP = mean pulmonary artery pressure, mRAP = mean right atrial pressure, NT-proBNP = N-terminal pro–brain natriuretic peptide, PVR = pulmonary vascular resistance, RHC = right heart catheterization sPESI = simplified Pulmonary Embolism Severity Index, WHO-FC = World Health Organization functional class

**Supplementary Table 2.** Comparison of patients with pulmonary embolism assigned to the baseline cohort (first 71 patients) and the validation cohort (following 42 patients).

|  | **APE - baseline cohort (n=71)** | **APE - validation cohort (n=42)** | ***P* value** |
| --- | --- | --- | --- |
| Heart rate, bpm | 102 [85–120] | 103 [86–115] | 0.56 |
| Sinus tachycardia (>100 bpm) | 38 (53.52%) | 23 (54.76%) | 0.9 |
| Sinus rhythm | 69 (97.18%) | 40 (95.24%) | 0.99b |
| Daniel’s score | 9 [5–12] | 7.5 [3–12] | 0.07 |
| **ECG markers of survival in PE** | | | |
| QRS fragmentation | 30 (42.25%) | 11 (26.19%) | 0.08 |
| RBBB | | | |
| Complete | 7 (9.86%) | 2 (4.76%) | 0.54b |
| Incomplete | 11 (15.49%) | 9 (21.43%) | 0.42 |
| Total | 18 (25.35%) | 11 (26.19%) | 0.92 |
| TWI in leads V1 through V3a | 34 (64.15%) | 17 (54.84%) | 0.51 |
| Precordial TWI range | 3 [2–6] | 3 [1–4] | 0.054 |
| TWI in inferior leads | 18 (25.35%) | 9 (21.43%) | 0.64 |
| Right axis deviation | 6 (8.5%) | 2 (4.76%) | 0.72b |
| Atrial fibrillation | 2 (2.82%) | 1 (2.38%) | 0.64b |
| SIQIIITIII | 35 (49.3%) | 14 (33.33%) | 0.1 |
| qR in lead V1 | 3 (4.23%) | 2 (4.76%) | 0.73b |
| STIP | 22 (31%) | 10 (23.8%) | 0.41 |
| **ECG markers of survival in PH** | | | |
| P-wave amplitude in lead II, mm | 1.12 [1–1.6] | 1.25 [1–1.5] | 0.88 |
| P-wave duration, ms | 80 [80–100] | 100 [80–120] | 0.09 |
| P wave > 2.5 mm | 1 (1.41%) | 0 (0%) | 0.79b |
| Precordial ECG voltage in all patients | 5.5 [3.5–8.5] | 5.75 [4–8.5] | 0.64 |
| Precordial ECG voltage >10.5 mm in all patients | 7 (9.85%) | 5 (11.9%) | 0.98b |
| Precordial ECG voltage in patients without complete or incomplete RBBB | 5.13 [3.5–8] | 5.38 [3.75–8.5] | 0.94 |
| Precordial ECG voltage >10.5 mm in patients without complete or incomplete RBBB | 4 (5.63%) | 4 (9.52%) | 0.69b |
| QRS duration in all patients, ms | 100 [80–100] | 90 [85–100] | 0.38 |
| QRS duration in patients without complete or incomplete RBBB, ms | 100 [80–100] | 90 [85–100] | 0.45 |
| QRS axis, ° | 30 [-4.3 to 62.6] | -1.76 [-30 to 60] | 0.16 |

Data are presented as number (percentage) or median [IQR].

a Patients without complete or incomplete RBBB, 53 of pulmonary embolism baseline cohort and 31 of pulmonary embolism validation group.

b Yates correction for small group (n≤5) was applied.

Abbreviations: ECG = electrocardiography, RBBB = right bundle branch block, TWI = T wave inversions, STIP = ST-segment ischemic pattern, RVH = right ventricular hypertrophy
